# Supplementary material
Source: publisher site journal article supplement (https://www.dovepress.com/article/318632)
Supplement: Supplementary file 1 [file get_supplementary_file.php]

**Appendix Ⅰ:** Scales validity and reliability

| Items | Std. Loading | t-value |
| --- | --- | --- |
| **Organizational Resilience (Lee et al., 2013)** | | |
| 1.Given how others depend on us, the way we plan for the unexpected is appropriate | 0.778 | 29.601 |
| 2.Our organization is committed to practicing and testing its emergency plans to ensure they are effective | 0.821 | 35.599 |
| 3.We have a focus on being able to respond to the unexpected | 0.809 | 33.908 |
| 4.We have clearly defined priorities for what is important during and after a crisis | 0.764 | 27.691 |
| 5.We proactively monitor our industry to have an early warning of emerging issues | 0.738 | 25.079 |
| 6. Our organization maintains sufficient resources to absorb some unexpected change | 0.729 | 22.677 |
| 7.If key people were unavailable, there are always others who could fill their role | 0.762 | 24.130 |
| 8.There would be good leadership from within our organization if we were struck by a crisis | 0.753 | 19.422 |
| 9.We are known for our ability to use knowledge in novel ways | 0.706 | 19.185 |
| 10.We can make tough decisions quickly | 0.644 | 16.288 |
| **Employee Resilience (Luthans et al., 2007)** | | |
| 1.When I have a setback at work, I have no trouble recovering from it, moving on | 0.573 | 8.407 |
| 2.I believe that I can analyze long-term problems and find solutions | 0.625 | 9.153 |
| 3.When meeting with management, I am confident in presenting things within my scope of work. | 0.724 | 18.671 |
| 4.I usually take stressful things at work in stride | 0.833 | 22.611 |
| 5.Because I have experienced a lot of hardships before, I can survive the difficult period | 0.839 | 27.861 |
| 6.In my current job, I feel that I can handle many things at the same time | 0.695 | 16.252 |
| **Managerial Resilience（Sinclair and Wallston, 2004）** | | |
| 1.I actively look for ways to replace the losses I encounter in life | 0.847 | 41.365 |
| 2.I believe that I can grow in positive ways by dealing with difficult situations | 0.943 | 70.956 |
| 3.I look for creative ways to alter difficult situations | 0.82 | 37.773 |
| 4.Regardless of what happens to me, I believe I can control my reaction to it | 0.884 | 55.682 |
| **Problem-focused coping (Kim, 2019; Kluger and DeNisi 1996)** | | |
| 1.The crisis helped me pay more attention to how I solve my problems. | 0.853 | 36.538 |
| 2.The crisis helped me think about strategies that I could use to solve my problems. | 0.867 | 39.528 |
| 3.The crisis made me wonder whether there were different approaches I could use to do better on my problems. | 0.775 | 21.644 |
| 4.The crisis made me improve the processes involved in solving my problems. | 0.783 | 18.336 |
| **Emotion-focused coping** (**Strutton and Lumpkin,1994)** | | |
| 1.Went along with fate, sometimes l just have bad luck | 0.763 | 17.096 |
| 2.Try to forget the crisis and refuse to think too much | 0.733 | 11.777 |
| 3.Made light of the situation, refused to get too serious about it | 0.746 | 13.970 |
| 4.Had fantasies about how things might turn out | 0.636 | 15.488 |
| 5.Wished the situation would go away or somehow be over with | 0.654 | 16.068 |
| 6.Hoped a miracle would happen | 0.752 | 15.766 |
| 7.Asked a colleague I respected for advice | 0.743 | 12.986 |
| 8.Fantasize about how things might turn out | 0.689 | 15.730 |
| 9.Treat myself to a favorite food or snack | 0.761 | 14.768 |
| 10.Avoided being with people in general | 0.648 | 15.385 |
| 11.Take time off and get away from the situation | 0.661 | 15.813 |

**Reference**

| Kim Y J , Kim J . Does Negative Feedback Benefit (or Harm) Recipient Creativity? The Role of the Direction of Feedback Flow[J]. The Academy of Management Journal, 2020,63(2):584-612.doi: 10.5465/amj.2016.1196 |
| --- |
| Kluger A , Denisi A . The Effects of Feedback Interventions on Performance: A Historical Review, a Meta-Analysis, and a Preliminary Feedback Intervention Theory[J]. Psychological Bulletin, 1996, 119(2):254-284.doi:10.1037/0033-2909.119.2.254 |
| Lee, A.V., Vargo, J. and Seville, E. Developing a tool to measure and compare organizations’ resilience[J].Natural Hazards Review, 2013,14(1):29-41.doi:10.1061/(ASCE)NH.1527-6996.0000075 |
| Luthans, F. , Avolio, B. J. , Avey, J. B. , & Norman, S. M. Positive psychological capital: measurement and relationship with performance and satisfaction[J]. Personnel Psychology,2007, 60(3): 541-572.doi:10.1111/j.1744-6570.2007.00083.x |
| Sinclair, V. G., & Wallston, K. A. The development and psychometric evaluation of the brief resilient coping scale[J]. Assessment, 2004,11(1): 94–101.doi: 10.1177/1073191103258144 |
| Strutton D , Lumpkin J R . Problem- and emotion-focused coping dimensions and sales presentation effectiveness[J]. Journal of the Academy of Marketing Science, 1994, 22(1):28. doi:10.1177/0092070394221003 |
